# Supplementary material for: Shenqi Fuzheng injection reverses M2 macrophage-mediated cisplatin resistance through the PI3K pathway in breast cancer
Source: PubMed Central journal article supplement (PMC9873177; doi:10.1371/journal.pone.0279752), 2023-01-24
Supplement: pone.0279752.s001.pdf [file pone.0279752.s001.pdf]

|   |   |   |   |   |   |   |   |   |                |
|---|---|---|---|---|---|---|---|---|----------------|
| - | + | - | - | - | - | - | - | - | SQZ 20         |
| - | - | + | - | - | - | - | + | - | SQZ 40         |
| - | - | - | + | - | - | - | - | - | SQZ 60         |
| - | - | - | - | + | - | + | + | + | Cisplatin 2    |
| - | - | - | - | - | - | + | - | + | Verapamil 1.35 |

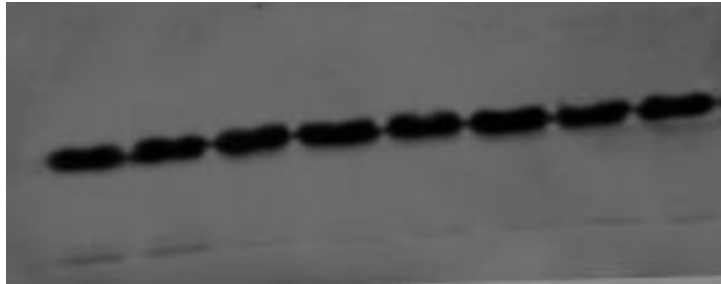

36 kD GAPDH

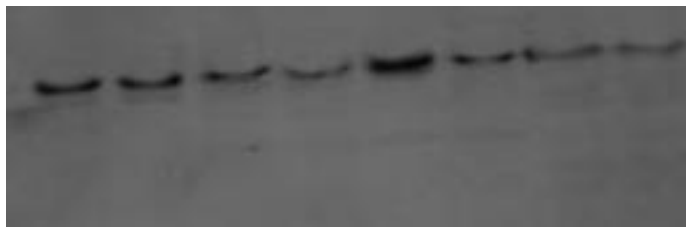

65-80 kD ABCG2

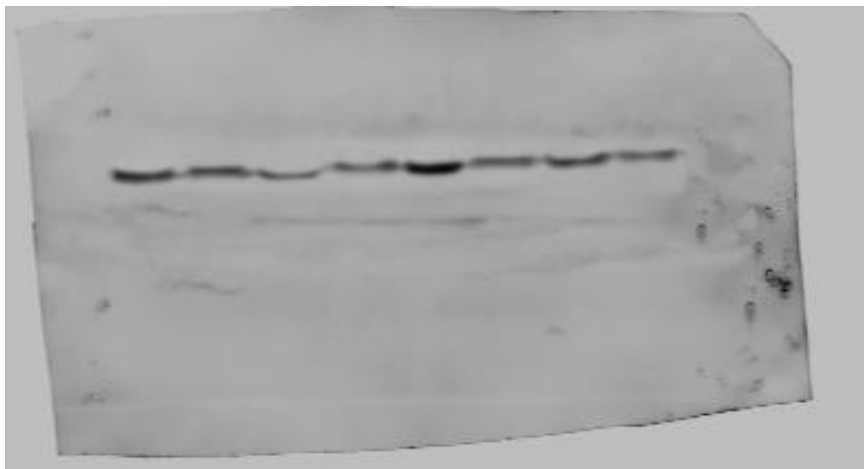

85 kD p-PI3k

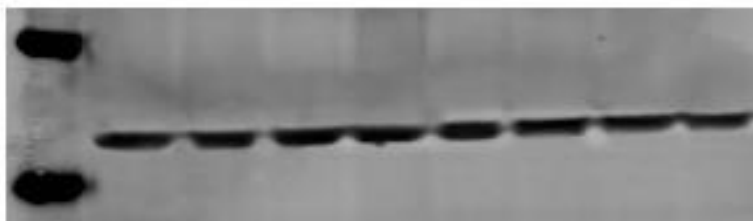

110 kD PI3k

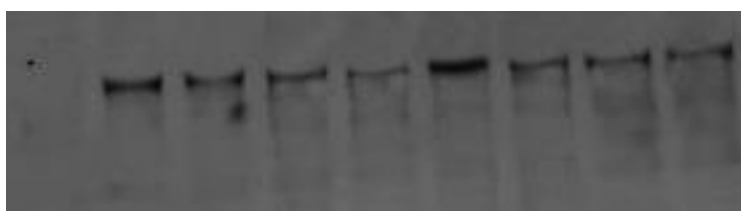

130-180 kD P-gp

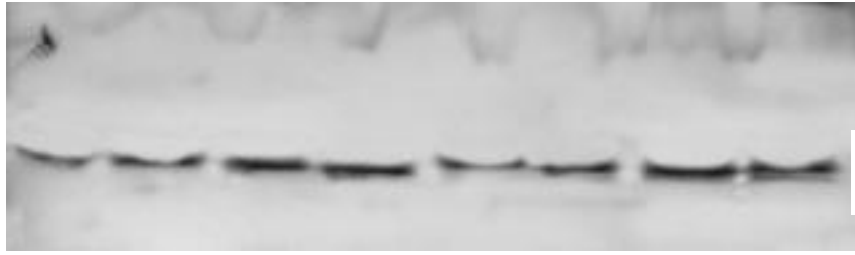

60-85 kD CD86

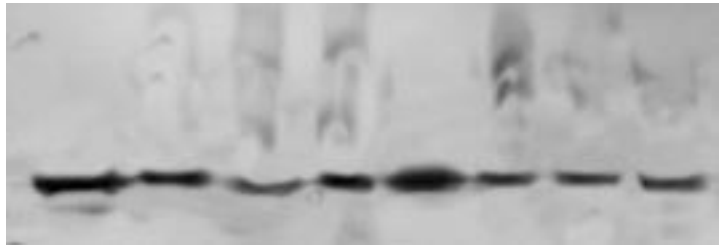

190 kD CD206

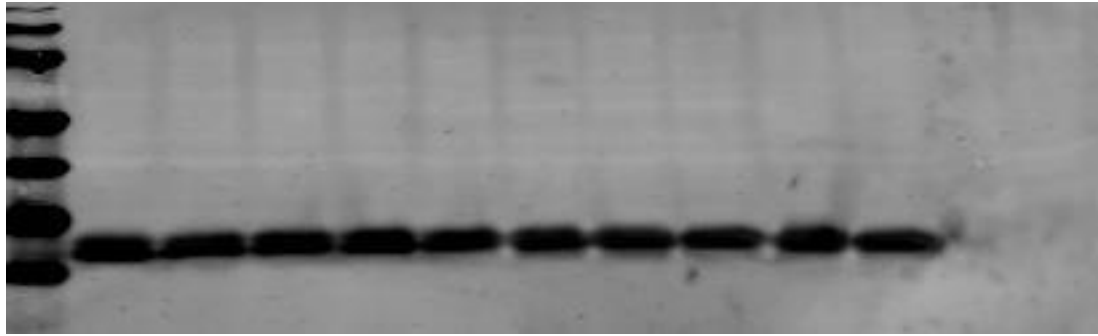

36 kD GAPDH

Control  
SQFZ 100  $\mu$ l/ml  
LY294002 20  $\mu$ mol/L  
IGF-1 100 ng/ml  
SQFZ+IGF-1

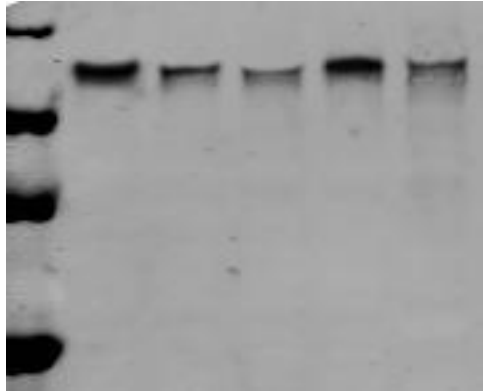

130-180 kD P-gp

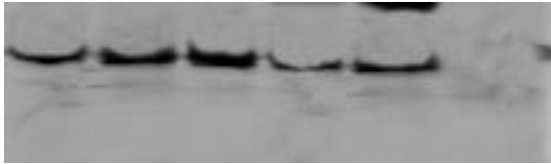

20 kD Bax

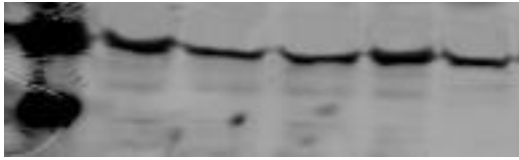

26 kD Bcl-2

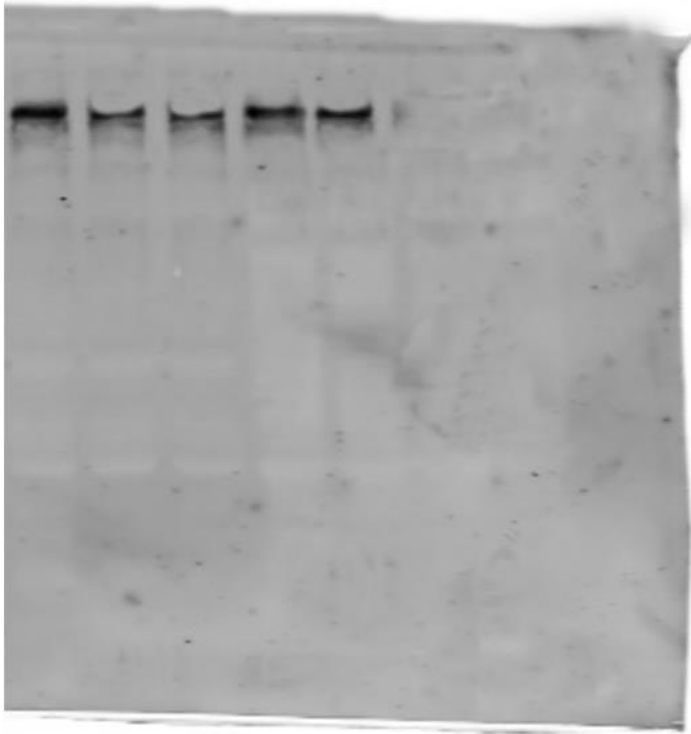

65-80 kD ABCG2

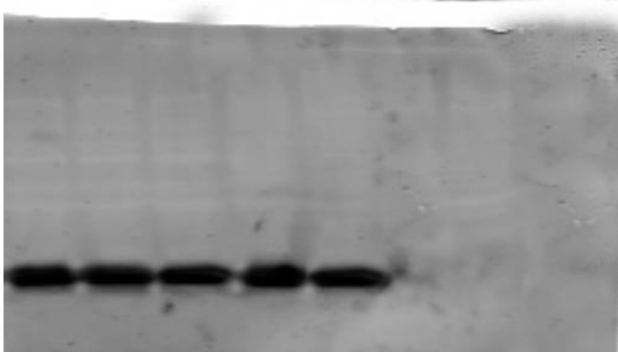

36 kD GAPDH
